1           **Long-term and serious harms of medical cannabis and cannabinoids for chronic pain: A**  
2                                                           **systematic review of non-randomized studies**

3

- 4   Dena Zeraatkar, *methodologist*  
5           *Department of Health Research Methods, Evidence, and Impact, McMaster University, Hamilton, ON*  
6           *Department of Biomedical Informatics, Harvard Medical School, Boston, MA*
- 7   Matthew Adam Cooper, *medical student*  
8           *Michael G. Degroote School of Medicine*  
9           *McMaster University, Hamilton, ON*
- 10   Arnav Agarwal, *resident physician*  
11           *Department of Medicine*  
12           *University of Toronto, Toronto, ON*
- 13   Robin W. M. Vernooij, *methodologist*  
14           *Netherlands Comprehensive Cancer Organization (IKNL)*  
15           *Utrecht, the Netherlands*
- 16   Gareth Leung, *methodologist*  
17           *Department of Public Health and Primary Care,*  
18           *University of Cambridge, Cambridge, UK*
- 19   Kevin Loniewski, *nursing student*  
20           *Faculty of Health, Seneca College, King City, ON.*  
21           *York University, Toronto, ON*
- 22   Jared E. Dookie, *medical student*  
23           *Schulich School of Medicine and Dentistry*  
24           *Western University, London, ON*
- 25   Muhammad Muneeb Ahmed, *medical student*  
26           *Michael G. Degroote School of Medicine*  
27           *McMaster University, Hamilton, ON*
- 28   Brian Younho Hong, *resident physician*  
29           *Division of Plastic and Reconstructive Surgery*  
30           *University of Toronto, Toronto, ON*
- 31   Chris J. Hong, *resident physician*  
32           *Department of Otolaryngology-Head & Neck Surgery*  
33           *University of Toronto, Toronto, ON*
- 34   Patrick Jiho Hong, *resident physician*  
35           *Department of Anesthesiology and Pain Medicine*  
36           *University of Toronto, Toronto, ON*
- 37   Rachel Couban, *medical librarian*  
38           *Department of Anesthesia*  
39           *Department of Health Research Methods, Evidence, and Impact*  
40           *McMaster University, Hamilton, ON*
- 41   Thomas Agoritsas, *assistant professor*  
42           *Department Medicine, University Hospitals of Geneva, Geneva, Switzerland*  
43           *Department of Health Research Methods, Evidence, and Impact, McMaster University, Hamilton, ON*
- 44   Jason W. Busse, *associate professor\**  
45           *Department of Anesthesia*  
46           *Department of Health Research Methods, Evidence, and Impact*  
47           *McMaster University, Hamilton, ON*  
48           *bussejw@mcmaster.ca*
- 49

50 \*Corresponding author

51 **Running head:** Harms of medical cannabis

52 **Abbreviations:** Cochrane Central Register of Controlled Trials (CENTRAL), Palmitoylethanolamide (PEA),  
53 tetrahydrocannabinol (THC)

54 **Keywords:** Medical cannabis, chronic pain, adverse events, harms, non-randomized studies,  
55 observational studies

56 **Disclaimers:** None.

57 **Funding:** DZ is supported by a Banting Postdoctoral Fellowship.

58 **Ethics approval:** The systematic review is exempt from ethics approval.

59 **Data:** Data will be made available upon publication: <https://osf.io/ut36z/>

60 **Acknowledgements:** We thank the members of the Rapid Recommendations panel for critical feedback  
61 on the selection of the adverse events of interest. We thank James MacKillop, PhD, for his help with the  
62 interpretation of problematic cannabis use, abuse, dependence and withdrawal syndrome within  
63 studies.

64 **Authors' Contributions:** JWB and TA conceived the idea. RC designed and conducted the search. DZ,  
65 MAC, AA, GL, KL, JD, BYH, CH, and PJH screened search records, extracted data, and assessed the risk of  
66 bias of the eligible studies. DZ conducted analyses. DZ, JWB, and TA interpreted the data. DZ wrote the  
67 first draft of the manuscript. JWB and TA critically revised the manuscript. All authors reviewed and  
68 approved the final version. DZ and JWB are the guarantors.

69  
70 \* I, the Submitting Author, have the right to grant and does grant on behalf of all authors of the Work  
71 (as defined in the author licence), an exclusive licence and/or a non-exclusive licence for contributions  
72 from authors who are: i) UK Crown employees; ii) where BMJ has agreed a CC-BY licence shall apply,  
73 and/or iii) in accordance with the terms applicable for US Federal Government officers or employees  
74 acting as part of their official duties; on a worldwide, perpetual, irrevocable, royalty-free basis to BMJ  
75 Publishing Group Ltd ("BMJ") its licensees.

76

77 Word count: 5,170

78 **Abstract**

79 **Objective:** To establish the risk and prevalence of long-term and serious harms of medical cannabis and  
80 cannabinoids for chronic pain.

81 **Design:** Systematic review and meta-analysis.

82 **Data sources:** MEDLINE, EMBASE, PsycInfo, and the Cochrane Central Register of Controlled Trials  
83 (CENTRAL) from inception to April 1, 2020.

84 **Study selection:** Non-randomized studies reporting on harms of medical cannabis or cannabinoids in  
85 people living with chronic pain with  $\geq 4$  weeks of follow-up.

86 **Data extraction and synthesis:** A parallel guideline panel provided input on the design and  
87 interpretation of the systematic review, including selection of adverse events for consideration. Two  
88 reviewers, working independently and in duplicate, screened the search results, extracted data, and  
89 assessed risk of bias. We used random-effects models for all meta-analyses and the GRADE approach to  
90 evaluate the certainty of evidence.

91 **Results:** We identified 39 eligible studies that enrolled 12,143 patients with chronic pain. Very low  
92 certainty evidence suggests that adverse events are common (prevalence: 26.0%; 95% CI 13.2 to 41.2)  
93 among users of medical cannabis or cannabinoids for chronic pain, particularly any psychiatric adverse  
94 events (prevalence: 13.5%; 95% CI 2.6 to 30.6). However, very low certainty evidence indicates serious  
95 adverse events, adverse events leading to discontinuation, cognitive adverse events, accidents and  
96 injuries, and dependence and withdrawal syndrome are uncommon and typically occur in fewer than  
97 one in 20 patients. We compared studies with  $< 24$  weeks and  $\geq 24$  weeks cannabis use and found more  
98 adverse events reported among studies with longer follow-up (test of interaction  $p < 0.01$ ).  
99 Palmitoylethanolamide was usually associated with few to no adverse events. We found insufficient  
100 evidence addressing the harms of medical cannabis compared to other pain management options, such  
101 as opioids.

102 **Conclusions:** There is very low certainty evidence that adverse events are common among people living  
103 with chronic pain who use medical cannabis or cannabinoids, but that few patients experience serious  
104 adverse events. Future research should compare long-term and serious harms of medical cannabis with  
105 other management options for chronic pain, including opioids.

106 Systematic review registration <https://osf.io/25bxf>

107 **What is already known on this topic**

- 108
- Medical cannabis and cannabinoids are increasingly used for the management of chronic pain.
- 109
- Clinicians and patients considering medical cannabis or cannabinoids as a treatment option for
- 110 chronic pain require evidence on benefits and harms, including long-term and serious adverse
- 111 events to make informed decisions.

112 **What this study adds**

- 113
- Very low certainty evidence suggests that adverse events are common among people living with
- 114 chronic pain who use medical cannabis or cannabinoids, including psychiatric adverse events,
- 115 though serious adverse events, adverse events leading to discontinuation, cognitive adverse
- 116 events, accidents and injuries, and dependence and withdrawal syndrome are uncommon.
- There is insufficient evidence comparing the harms of medical cannabis or cannabinoids to other
- 117 pain management options, such as opioids.
- 118

119

120

## 121 **Background**

122 Chronic pain is the primary cause of health care resource use and disability among working adults in  
123 North America and Western Europe.<sup>1 2</sup> The use of cannabis for the management of chronic pain is  
124 becoming increasingly common due to pressure to reduce opioid use, increased availability and  
125 changing legislation, shift in public attitudes and decreased stigma, and aggressive marketing.<sup>3 4</sup> The two  
126 most-studied cannabinoids in medical cannabis are delta-9-tetrahydrocannabinol (THC) and cannabidiol  
127 (CBD).<sup>5</sup> THC binds to cannabinoid receptors type 1 and 2, is an analog to the endogenous cannabinoid,  
128 anandamide, and has shown psychoactive, analgesic, anti-inflammatory, antioxidant, antipruritic, anti-  
129 spasmodic, and muscle-relaxant activities. CBD directly interacts with various ion channels to produce  
130 analgesic, anti-inflammatory, anti-convulsant and anxiolytic activities, without the psychoactive effect of  
131 THC.<sup>5</sup> Use of cannabis for therapeutic purposes, however, remains contentious due to its known and  
132 suspected harms.<sup>6-9</sup>

133 Though common adverse events caused by medical cannabis, including nausea, vomiting, headache,  
134 drowsiness, and dizziness, have been well documented in randomized controlled trials and reviews of  
135 randomized controlled trials,<sup>10 11</sup> less is known about potentially uncommon but serious adverse events,  
136 particularly events that may occur with longer durations of medical cannabis use, such as dependence,  
137 withdrawal symptoms, and psychosis.<sup>4 12-17</sup> Such adverse events are usually observed in large non-  
138 randomized studies that recruit larger numbers of patients and typically follow them for longer  
139 durations of time. Further, evidence from non-randomized studies may be more generalizable, since  
140 randomized controlled trials typically use strict eligibility criteria.

141 The objective of this systematic review and meta-analysis is to summarize the evidence on the risks and,  
142 when evidence on risk is not available, the prevalence of adverse events related to medical cannabis and  
143 cannabinoids from non-randomized studies. This evidence synthesis is part of the *BMJ Rapid*  
144 *Recommendations* project, a collaborative effort from the *MAGIC Evidence Ecosystem Foundation*  
145 ([www.magicevidence.org](http://www.magicevidence.org)) and the *BMJ*.<sup>18</sup> A guideline panel helped define the study question and  
146 selected adverse events for review. The adverse events of interest include psychiatric and cognitive  
147 adverse events, injuries and accidents, and dependence and withdrawal. It is one of four systematic  
148 reviews that together informed a parallel guideline on medical cannabis and cannabinoids published on  
149 [bmj.com](http://bmj.com) and the *MAGICapp*.<sup>11 19-21</sup> A parallel systematic review addressed evidence from randomized  
150 trials.<sup>11</sup>

151

## 152 **Methods**

153 We report our systematic review in accordance with the PRISMA Harms Checklist.<sup>22</sup> We registered the  
154 protocol for our review at OSF (<https://osf.io/25bxf>).<sup>22</sup>

### 155 ***Guideline panel involvement***

156 A guideline panel helped define the study question and selected the adverse events for review. The  
157 panel included nine content experts (two general internists, two family physicians, a pediatrician, a  
158 physiatrist, a pediatric anesthesiologist, a clinical pharmacologist, and a rheumatologist), nine  
159 methodologists (five of whom are also front-line clinicians), and three people living with chronic pain  
160 (one of whom used cannabinoids for medical purposes).

### 161 ***Patient and public involvement***

162 Three patient partners were included as part of the guideline panel and contributed to the selection and  
163 prioritization of outcomes, protocol, and interpretation of review findings, and provided insight on  
164 values and preferences.

### 165 ***Search***

166 A medical librarian searched MEDLINE, EMBASE, PsychInfo, and Cochrane Central Register of Controlled  
167 Trials (CENTRAL) from inception to April 1, 2020, with no restrictions on language, for non-randomized  
168 studies reporting on harms or adverse events of medical cannabis or cannabinoids for chronic pain  
169 (Appendix 1). We scanned reference lists of relevant reviews to identify any eligible studies not retrieved  
170 by our electronic search and solicited content experts from our panel for unpublished studies.

### 171 ***Study selection***

172 Reviewers, working independently and in duplicate, reviewed titles and abstracts of search records and  
173 subsequently full texts of records found potentially eligible at the title and abstract screening stage.  
174 Reviewers resolved disagreements by discussion or by adjudication by a third reviewer (DZ).

175 We included all non-randomized studies that reported on any patient-important harm or adverse event  
176 associated with the use of any formulation of medical cannabis or cannabinoids in adults or children,  
177 living with chronic pain (pain lasting for  $\geq 3$  months) or a medical condition associated with chronic pain

178 (i.e., fibromyalgia, arthritis, multiple sclerosis, neuropathy, inflammatory bowel disease, stroke, or  
179 advanced cancer) or that compared adverse events associated with medical cannabis or cannabinoids  
180 with another pharmacologic or non-pharmacologic intervention. Based on input from the guideline  
181 panel, we excluded studies in which patients used cannabis for less than 4 weeks because we  
182 anticipated that four weeks would be the minimum amount of time after which we would reasonably  
183 expect to observe potential serious or long term harms associated with medical cannabis.<sup>23</sup> We looked  
184 for explicit statements or evidence that patients were experiencing chronic pain. We excluded studies in  
185 which: (1) fewer than 25 patients used medical cannabis or cannabinoids, (2) patients did not suffer  
186 from chronic pain or a condition that commonly causes chronic pain or more than 20% of patients  
187 reported using medical cannabis or cannabinoids for a condition other than chronic pain, (3) patients  
188 were using medical cannabis for recreational reasons, (4) only surrogate measures of patient-important  
189 harms and adverse effects (e.g., performance on cognitive tests, lab values) were reported, and (5)  
190 systematic reviews and other types of studies that did not describe primary data.

#### 191 ***Data extraction and risk of bias***

192 Reviewers, working independently and in duplicate and using a standardized and pilot-tested data  
193 collection form, extracted the following information from each eligible study: (1) study design, (2)  
194 patient characteristics (age, sex, condition/diagnosis), (3) characteristics of medical cannabis or  
195 cannabinoids (name of product, dose, and duration), and (4) number of patients that experienced  
196 adverse events, including all adverse events, serious adverse events, and withdrawal due to adverse  
197 events. We classified adverse events as serious based on the classification used in primary studies. For  
198 comparative studies, we collected results from models adjusted for confounders, when reported, and  
199 unadjusted models when results for adjusted models were not reported.

200 When studies reported the number of events rather than the number of patients experiencing adverse  
201 events, we only extracted the number of events if they were infrequent (the number of events  
202 accounted for less than 10% of the total number of study participants). For studies that reported on  
203 adverse events at multiple timepoints, we extracted data for the longest point of follow-up that  
204 included, at minimum, 80% of the patients recruited into the study. Reviewers resolved disagreements  
205 by discussion or by adjudication with a third reviewer (DZ).

206 We used the Cochrane-endorsed ROBINS-I tool to rate the risk of bias of studies as low, moderate,  
207 serious, or critical across seven domains: (1) bias due to confounding, (2) selection of patients into the



208 study, (3) classification of the intervention, (4) bias due to deviations from the intended intervention, (5)  
209 missing data, (6) measurement of outcomes, and (7) selection of reported results.<sup>24</sup> Appendix 2 presents  
210 additional details on the assessment of risk of bias. Studies were rated at low risk of bias overall when all  
211 domains were at low risk of bias; moderate risk of bias if all domains were rated at low or moderate risk  
212 of bias; at serious risk of bias when all domains were rated either at low, moderate, or serious risk of  
213 bias; and at critical risk of bias when one or more domains were rated as critical.

#### 214 ***Data synthesis***

215 In this review, we synthesize data on serious adverse events and adverse events that may emerge with  
216 longer duration of medical cannabis use for which data is typically not reported in randomized trials.  
217 Identified by a parallel BMJ Rapid Recommendations guideline panel as important, these patient-  
218 important outcomes included psychiatric and cognitive adverse events, injuries and accidents, and  
219 dependence and withdrawal. Data on all other adverse events reported in primary studies are available  
220 in an open-access database (<https://osf.io/ut36z/>).

221 Adverse events are reported as binary outcomes. For comparative studies, when possible, we present  
222 risk differences and associated 95% confidence intervals (95% CIs). Since there were only two eligible  
223 comparative studies each with different comparators, we did not perform meta-analysis. For single-arm  
224 studies, we pooled the proportion of patients experiencing adverse events of interest by first applying a  
225 Freeman-Tukey type arcsine square root transformation to stabilize the variance. Without this  
226 transformation, very high or very low prevalence estimates can produce confidence intervals that  
227 contain values lower than 0% or higher than 100%. All meta-analyses used DerSimonian-Laird random-  
228 effects models, which are conservative as they consider both within- and between-study variability.<sup>25-27</sup>  
229 We evaluated heterogeneity for all pooled estimates through visual inspection of forest plots and  
230 calculation of tau-squared ( $\tau^2$ ), because some statistical tests of heterogeneity ( $I^2$  and Cochrane's Q) can  
231 be misleading when sample sizes are large and CIs are therefore narrow.<sup>28</sup> For studies that reported  
232 estimates for all-cause adverse events and those deemed to be potentially related to cannabis use, we  
233 preferentially synthesized results for all adverse events.

234 For analyses for which we observed high clinical heterogeneity (i.e., substantial differences in the  
235 estimates of individual studies and minimal overlap in the confidence intervals), we presented results  
236 narratively.

237 We classified adverse events as serious based on the classification used in primary studies.

238 We performed tests of interaction to establish whether subgroups differed significantly from one  
239 another. We assessed the credibility of significant subgroup effects (test of interaction  $p < 0.05$ ) using  
240 published criteria.<sup>29 30</sup>

241 We performed all analyses using the 'meta' package in R (version 3.5.1, R Foundation for Statistical  
242 Computing).<sup>31</sup>

### 243 ***Certainty of evidence***

244 We used the GRADE approach to rate the certainty of evidence.<sup>32 33</sup> Based on GRADE guidance for using  
245 the ROBINS-I tool, evidence starts at high certainty and is downgraded by one level when the majority of  
246 the evidence comes from studies at moderate risk of bias, two levels when the majority of the evidence  
247 comes from studies at high risk of bias, and three levels when the majority of the evidence comes from  
248 studies rated at critical risk of bias.<sup>32</sup> We additionally considered potential limitations due to indirectness  
249 if the population, intervention, or adverse events assessed in studies did not reflect the populations,  
250 interventions, or adverse events of interest, inconsistency if there was important unexplained  
251 differences in the results of studies, and imprecision if the upper and lower bounds of confidence  
252 intervals indicated appreciably different rates of adverse events. For assessing inconsistency and  
253 imprecision for the outcome all adverse events, based on feedback from the guideline panel, we  
254 deemed a 20% difference in the prevalence of all adverse evidence to be patient-important; a 10%  
255 difference for adverse events leading to discontinuation, serious adverse events, and psychiatric,  
256 cognitive, withdrawal and dependence, injuries; and a 3% difference for potentially fatal adverse events,  
257 such as suicides and motor vehicle accidents. We followed GRADE guidance for communicating our  
258 findings.<sup>34</sup> Guideline panel members interpreted the magnitude of adverse events and decided whether  
259 the observed prevalence of adverse events was sufficient to affect patients' decisions to use medical  
260 cannabis or cannabinoids for chronic pain.

## 261 **Results**

### 262 ***Study selection***

263 Our search yielded 17,178 unique records of which 39 were eligible for review (Figure 1, Appendix 3).<sup>35-</sup>  
264 <sup>73</sup> Appendix 4 presents studies excluded at the full-text screening stage and accompanying reasons for  
265 exclusion.

266 **Description of studies**

267 Studies included 12,143 adults living with chronic pain and included a median of 100 (IQR 34 to 361)  
268 participants (Table 1). Most studies (30/39; 76.9%) were longitudinal in design. Eighteen studies (46.2 %)  
269 were conducted in Western Europe, fourteen (35.9%) in North America, six (15.4%) in Israel, and two  
270 (5.1%) in the United Kingdom. Ten studies (25.6%) were funded by industry alone or industry in  
271 combination with government and institutional funds; the remainder were funded either by  
272 governments, institutions, or not-for-profit organizations (n=9; 23.1%), did not receive funds (n=3;  
273 7.7%), or did not report funding information (n=17; 43.6%).

274 Thirty studies (76.9%) reported on people living with chronic non-cancer pain, eight (n=20.5%) with  
275 mixed cancer and non-cancer chronic pain, and one (2.6%) with chronic cancer pain. All studies reported  
276 on adults. Sixteen studies reported on mixed types of herbal cannabis (e.g., buds for smoking,  
277 vaporizing, and ingesting, hashish, oils, extracts, edibles), nine on palmitoylethanolamide (PEA), four  
278 each on nabiximols and dronabinol, two on nabilone, one each on Trokie lozenges and extracts, and four  
279 did not report the type of medical cannabis used. One study reported on three types of medical  
280 cannabis (dronabinol, nabiximols, and mixed herbal) separately. The median duration of medical  
281 cannabis use was 24 weeks (IQR 12.0 to 33.8 weeks). Two studies were comparative: one study  
282 compared nabilone with gabapentin and another compared herbal cannabis with standard care.<sup>39 48</sup>  
283 Studies reported a total of 525 unique adverse events.

284 **Risk of bias**

285 Appendix 5 presents the risk of bias of included studies. We rated all results at critical risk of bias except  
286 for the comparative results from two studies,<sup>39 48</sup> which were rated at serious and moderate risk of bias.  
287 The primary limitation across studies was inadequate control for potential confounding either due to the  
288 absence of a control group or inadequate adjustment for confounders. A third of studies were rated at  
289 serious risk of bias for selection bias, primarily because they included prevalent users of medical  
290 cannabis. Such studies may underestimate the incidence of adverse events since patients that  
291 experience adverse events are more likely to discontinue medical cannabis early. Such studies may also  
292 include adverse events that may have been present at inception and that are unrelated to medical  
293 cannabis use.

294 ***All adverse events***

295 Twenty longitudinal and two cross-sectional studies, including 4,108 patients, reported the number of  
296 patients experiencing one or more adverse events.<sup>36-43 46 47 54 56-60 62 64 65 69 70 73</sup> Seven studies reported on  
297 PEA, five on mixed herbal cannabis, three each on nabilone and nabiximols, two on dronabinol, and one  
298 each on extracts and Trokie lozenges. The median duration of medical cannabis use was 24 weeks [IQR  
299 12 to 32]. We observed substantial unexplained heterogeneity and so summarize the results  
300 descriptively (Appendices 6 to 9). The prevalence of any adverse event ranged between 0% to 92.1%.  
301 Studies with less than 24 weeks of cannabis use typically reported fewer adverse events than those with  
302 more than 24 weeks. Patients using PEA experienced no adverse events. The evidence was overall very  
303 uncertain due to risk of bias and inconsistency.

304 One study suggested that nabilone may reduce the risk of adverse events compared to gabapentin (-  
305 13.1%; 95% CI -26.2 to 0), but the certainty of evidence was very low due to risk of bias and imprecision  
306 (Table 2).

307 ***Adverse events leading to discontinuation***

308 Twenty longitudinal studies, including 6,509 patients, reported on the number of patients that  
309 discontinued medical cannabis or cannabinoids due to adverse events.<sup>37 39 41-44 46-49 52 54 56 57 59 62 63 65 70 73</sup>  
310 Eight studies reported on PEA, four studies on mixed herbal cannabis, three on nabiximols, two on  
311 nabilone, and one each on dronabinol and extracts, and one study did not report the type of medical  
312 cannabis used by patients. The median duration of cannabis use was 24 weeks [IQR 8.6 to 32]. We  
313 observed substantial unexplained heterogeneity and so summarize the results descriptively (Appendices  
314 10 to 12). The prevalence of discontinuations due to adverse events ranged between 0% to 27.0%.  
315 Studies with less than 24 weeks of cannabis use typically reported fewer discontinuations than those  
316 with more than 24 weeks. Patients using PEA experienced no adverse events. The evidence was overall  
317 very uncertain due to risk of bias and inconsistency.

318 One study suggested herbal cannabis may increase the risk of adverse events leading to discontinuation  
319 compared to standard care without cannabis (4.7%; 95% CI 1.8 to 7.5). Another study suggested that  
320 nabilone may reduce the risk of adverse events leading to discontinuation compared to gabapentin (-  
321 9.4%; 95% CI -18.5 to -0.2). The certainty of evidence was low to very low due to risk of bias and  
322 imprecision.

323 ***Serious adverse events***

324 Twenty-two longitudinal and two cross-sectional studies, including 4,273 patients, reported on the  
325 number of patients experiencing one or more serious adverse events.<sup>35-37 39-43 46 48 49 52 54-60 62 65 70 71 73</sup> Eight  
326 studies reported on mixed herbal cannabis, eight on PEA, two each on nabilone and nabiximols each,  
327 and one study each on dronabilon, extracts, and Trokie lozenges, and one study did not report the type  
328 of cannabis used. The median duration of medical cannabis or cannabinoid use was 24 weeks (IQR 12 to  
329 32), and few patients experienced serious adverse events (1.2%; 95% CI 0.1 to 3.1;  $I^2=91%$ ) (Figure 2)  
330 (Appendices 13 to 15). There was a statistically significant subgroup effect across different types of  
331 medical cannabis though serious adverse events appeared consistently uncommon among different  
332 types (low credibility). The certainty of evidence was very low overall due to serious risk of bias.

333 One study suggested herbal cannabis increased the risk of serious adverse events compared to standard  
334 care without cannabis (1.5%; 95% CI -8.3 to 20.2). Another study found use of nabilone vs. gabapentin  
335 showed no difference in the risk of serious adverse events. The certainty of evidence was low to very  
336 low for both studies due to risk of bias and imprecision.

337 ***Psychiatric adverse events***

338 Eleven longitudinal and two cross-sectional studies, including 6,600 patients, reported on any psychiatric  
339 adverse events, including psychiatric disorders, suicide, suicidal thoughts, depression, mania,  
340 hallucinations, delusions, paranoia, anxiety, and euphoria (Appendices 16 to 25).<sup>35-37 43 47 48 60 63 67 68 70</sup> Five  
341 studies reported on mixed herbal cannabis, four on nabiximols, one each on dronabinol, nabilone, and  
342 mixed types and one study did not specify the type of medical cannabis. The median duration of  
343 cannabis use across studies was 52 weeks (IQR 20 to 52). Approximately one in seven medical cannabis  
344 users experienced one or more psychiatric disorders or adverse events (13.5%; 95% CI 2.6 to 30.6;  
345  $I^2=98%$ ). The most frequently occurring psychiatric adverse events were paranoia (5.6%; 9% CI 0 to 19.2;  
346  $I^2=85%$ ) and anxiety (7.4%; 95% CI 0 to 26.9;  $I^2=99%$ ). The certainty of evidence was very low due to risk  
347 of bias, inconsistency (for psychiatric disorders and paranoia), and imprecision (for psychiatric disorder,  
348 paranoia, and anxiety).

349 One study suggested that herbal cannabis may result in a trivial to moderate increase in the risk for  
350 psychiatric disorders, mania, hallucinations, depression, paranoia, anxiety, and euphoria and a reduction  
351 in the risk for suicides and delusions, compared with standard care without cannabis, though the  
352 certainty of evidence was low to very low due to risk of bias and imprecision.

353 ***Cognitive and attentional adverse events***

354 Eleven longitudinal studies, including 6,257 patients, reported on cognitive adverse events, including  
355 memory impairment, confusion, disorientation, and impaired attention (Appendices 26 to 29).<sup>35-37 43 47 48</sup>

356 <sup>60 63 67 68 70</sup> Five studies reported on herbal cannabis, three on nabiximols, three on mixed types of  
357 cannabis, and one each on dronabinol and nabilone. The median duration of cannabis use was 52 weeks  
358 (IQR 24 to 52). The prevalence of cognitive adverse events ranged from 1.6% (95% CI 0.6 to 3.0;  $I^2=88\%$ )  
359 to 5.3% (95% CI 2.1 to 9.6;  $I^2=96\%$ ) for disorientation and memory impairment, respectively. The  
360 certainty of evidence was very low due to risk of bias.

361 One study suggests herbal cannabis may slightly increase the risk for memory impairment and  
362 disturbances in attention compared to standard care without cannabis, but reduce the risk for  
363 confusion, though the certainty of evidence was low to very low due to risk of bias and imprecision.

364 ***Accidents and injuries***

365 One longitudinal study, including 431 patients, reported on accidents and injuries in patients using  
366 mixed herbal cannabis for 52 weeks (Appendices 30 & 31).<sup>48</sup> This study suggests herbal cannabis used  
367 for medical purposes may slightly increase the risk of motor vehicle accidents (0.5%; 95% CI -0.4 to 1.4)  
368 but may not increase the risk of falls (0%; 95% CI -2.8 to 2.9). The certainty of evidence was low due to  
369 risk of bias.

370 ***Dependence and withdrawal***

371 Four longitudinal and one cross-sectional study, including 2,248 patients, reported on dependence-  
372 related adverse events, including dependence (one study reported on 'abuse' based on unspecified  
373 criteria, one study reported on 'problematic use' using the Alcohol Use Disorder and Associated  
374 Disabilities Interview Schedule–Diagnostic and Statistical Manual of Mental Disorders–Fourth Edition  
375 (AUDADIS-IV)<sup>74</sup>, and one study reported on 'dependence' using the Alcohol, Smoking, and Substance  
376 Involvement Screening Test<sup>75</sup>), withdrawal symptoms (defined as one or moderate or severe withdrawal  
377 symptoms including sleep difficulties, anxiety, irritability, and appetite disturbance), and withdrawal  
378 syndrome (two studies that used unspecified criteria) (Appendices 32 to 34).<sup>48 53 56 67 70</sup> Two studies  
379 reported on herbal cannabis, one each on nabiximols and nabilone, and one did not specify type of  
380 medical cannabis used by patients. Follow-up ranged from 12 to 52 weeks. Though dependence and  
381 withdrawal syndrome were uncommon with a prevalence of 4.4% (95% CI 0.0 to 19.9;  $I^2=99\%$ ) and 2.1%

382 (95% CI 0 to 8.2;  $I^2=89\%$ ), respectively, withdrawal symptoms were common (67.8%; 95% CI 64.1 to  
383 71.4). The certainty of evidence was very low due to risk of bias, inconsistency, imprecision (for  
384 dependence), and indirectness due to definitions of outcomes in studies were too vague to confidently  
385 distinguish between dependence, addiction, withdrawal symptoms, and withdrawal syndrome.

386 One study suggested that herbal cannabis compared to standard care may slightly increase the risk of  
387 withdrawal syndrome (0.5%; 95% CI -0.4 to 1.4) but the certainty of evidence was low due to risk of bias.

## 388 **Discussion**

### 389 ***Main findings***

390 Our systematic review and meta-analysis provides evidence that adverse events are common among  
391 people living with chronic pain who use medical cannabis or cannabinoids, with approximately one in  
392 four experiencing at least one adverse event—though the certainty of evidence is very low and the true  
393 prevalence of adverse events may be substantially different. In contrast, serious adverse events, adverse  
394 events leading to discontinuation, cognitive adverse events, accidents and injuries, and dependence and  
395 withdrawal syndrome are uncommon. We compared studies with <24 weeks and  $\geq 24$  weeks cannabis  
396 use and found more adverse events reported among studies with longer follow-up. This may be  
397 explained by increased tolerance (tachyphylaxis) with prolonged exposure, necessitating increases in  
398 dosage with consequent increased risk of harms. PEA, compared to other formulations of medical  
399 cannabis, may result in the fewest adverse events. Though adverse events appear to be common, few  
400 patients discontinued medical cannabis due to adverse events suggesting that most adverse events are  
401 transient and/or outweighed by perceived benefits.

402 Our review represents the most comprehensive review of evidence from non-randomized studies  
403 addressing adverse events of medical cannabis or cannabinoid use in people living with chronic pain.  
404 While several previous reviews have summarized the evidence on short-term and common adverse  
405 events of medical cannabis reported in randomized trials, such as oral discomfort, dizziness, and  
406 headaches, our review focuses on serious and rare adverse events—the choice of which was informed  
407 by a panel including patients, clinicians, and methodologists—and non-randomized studies, which can  
408 follow larger numbers of patients for longer periods of time and thus may detect adverse events that  
409 are infrequent or that are associated with longer durations of cannabis use.<sup>10 76-80</sup> A parallel systematic  
410 review of evidence from randomized controlled trials found no evidence to inform long-term harms of  
411 medical cannabis as no eligible trial followed patients for more than 5.5 months.<sup>11</sup> One previously

412 published review that included non-randomized studies searched the literature until 2007, included  
413 studies exploring medical cannabis for any indication (excluding synthetic cannabinoids) of which only  
414 two enrolled people living with chronic pain.<sup>12</sup> The review also did not synthesize adverse event data  
415 from non-randomized studies.<sup>12</sup> Unlike previous reviews, we focused exclusively on medical cannabis for  
416 chronic pain and excluded recreational cannabis, because cannabis used for recreational purposes often  
417 contains higher concentrations of tetrahydrocannabinol (THC) than medical cannabis. We also focused  
418 on chronic pain because this patient population may be susceptible to different adverse events.  
419 Depression and anxiety, for example, are commonly occurring comorbidities of chronic pain, which may  
420 be exacerbated by cannabis.<sup>15-17</sup>

#### 421 ***Strengths and limitations***

422 Strengths of this systematic review and meta-analysis include a comprehensive search for non-  
423 randomized studies, explicit eligibility criteria, screening of studies and collection of data in duplicate to  
424 increase reliability, and use of the GRADE approach to evaluate the certainty of evidence.

425 Our review is limited by the non-comparative design of most studies, which precludes confident  
426 inferences regarding the proportion of adverse events that can be attributed to medical cannabis or  
427 cannabinoids and the magnitude by which medical cannabis may increase or decrease the risk of  
428 adverse events compared to other pain management options. Though adverse events appear common  
429 among medical cannabis users, it is possible that other management options for chronic pain,  
430 particularly opioids, may be associated with more (and more severe) adverse events.<sup>81</sup> Partly due to the  
431 non-comparative design of most studies, nearly all results included in our review were at serious or  
432 critical risk of bias for confounding, either due to the absence of a control group or due to insufficient  
433 adjustment for important confounders. Further, a third of studies were at high risk of selection bias,  
434 primarily because they included prevalent cannabis users. In such studies, the prevalence of adverse  
435 events may be underestimated. Our review provides limited evidence on the harms of medical cannabis  
436 beyond one year of use since most studies reported adverse events for less than one year of follow-up.

437 We observed some inconsistency for many adverse events of interest and substantial inconsistency for  
438 all adverse events and adverse events leading to discontinuation. We downgraded the certainty of  
439 evidence when we observed important inconsistency and we did not present estimates from meta-  
440 analyses for all adverse events and adverse events leading to discontinuation due to substantial  
441 inconsistency.



442 Sixteen of 39 studies reported on herbal medical cannabis, some of which were consumed by smoking  
443 or vaporizing, and may be associated with different adverse events (e.g. respiratory) than other  
444 formulations of medical cannabis. We attempted to perform subgroup analyses based on the type of  
445 medical cannabis. Results for subgroups, however, lacked credibility due to inconsistency and/or  
446 imprecision.

447 Clinicians and patients may be more inclined to use medical cannabis or cannabinoids for pain relief if  
448 adverse events are mild; however, the evidence on whether adverse events are transient, life  
449 threatening, or the extent to which they impact quality of life is limited. While more than half of studies  
450 reported on the proportion of adverse events that were serious, criteria for ascertaining severity were  
451 rarely reported. None of the included studies reported the duration for which patients experienced  
452 adverse events. Further, most primary studies did not report adequate details on methods for the  
453 ascertainment of adverse events, including definitions or diagnostic criteria. The two studies that  
454 reported on withdrawal syndrome, for example, did not provide diagnostic criteria.<sup>48 56</sup> However, the  
455 DSM-5 requires  $\geq 3$  of 7 withdrawal symptoms to be present within a week of stopping cannabis use to  
456 meet a diagnosis of cannabis withdrawal syndrome.<sup>82</sup> It is therefore reasonable that people living with  
457 chronic pain that use medical cannabis would be more likely to experience withdrawal symptoms vs.  
458 withdrawal syndrome.

459 While children and youth account for approximately 15% of all chronic pain patients, we did not identify  
460 any evidence addressing the harms of medical cannabis in this population.<sup>83</sup> As such, the extent to which  
461 our findings are generalizable to pediatric populations is uncertain. Although there is evidence that  
462 cannabis use during youth is associated with increased risk of acute psychotic disorders, particularly  
463 acute psychosis,<sup>84</sup> such studies have explored use of recreational cannabis that contains greater  
464 amounts of THC than is typically seen in medical preparations. Further, the population of patients with  
465 chronic pain on which the studies report may not be representative of all patients with chronic pain—  
466 particularly rare conditions that cause chronic pain.

467 Finally, we excluded studies from meta-analyses when they did not explicitly report the adverse events  
468 of interest to our panel members. This may have overestimated the prevalence of adverse events if the  
469 adverse events of interest were not observed in the studies in which they were not reported. This was,  
470 however, not possible to confirm because methods for the collection and reporting of adverse event

471 data across studies were variable (e.g., active monitoring vs. passive surveillance; collecting data on  
472 specific adverse events vs. all adverse events) and poorly described in study reports.

### 473 ***Implications***

474 Our systematic review and meta-analysis shows that evidence regarding long-term and serious harms of  
475 medical cannabis or cannabinoids is insufficient—an issue with important implications for patients and  
476 clinicians considering this management option for chronic pain. While the evidence suggests that  
477 adverse events are common in patients using medical cannabis for chronic pain, serious adverse events  
478 appear uncommon, which suggests that the potential benefits of medical cannabis or cannabinoids  
479 (although very modest) may outweigh potential harms for some patients.<sup>11 21</sup>

480 Clinicians and patients considering medical cannabis should be aware that more adverse events were  
481 reported among studies with longer follow-up, necessitating long term follow-up of patients and re-  
482 evaluation of pain treatment options. Our findings also have implications for the choice of medical  
483 cannabis. We found PEA, for example, to consistently be associated with few or no adverse events  
484 across studies, though the evidence on the efficacy of PEA is limited.<sup>11</sup>

485 We found very limited evidence comparing medical cannabis or cannabinoids with other pain  
486 management options. Other pharmacological treatments for chronic pain, such as gabapentinoids,  
487 antidepressants, and opioids, may be associated with more (and more serious) adverse events.<sup>85-87</sup> To  
488 guide patients' and clinicians' decisions on medical cannabis for chronic pain, future research should  
489 compare the harms of medical cannabis and cannabinoids with other pain management options,  
490 including opioids, ideally beyond one year of use, and adjust results for confounders. Future research  
491 could also explore whether the harms of medical cannabis vary depending on the type of chronic pain.

492 Our review highlights the need for standardization of reporting of adverse events in non-randomized  
493 studies since such studies represent a critical source of data on long-term and infrequently occurring  
494 harms. To enhance the interpretability of adverse event data, future studies should also report the  
495 duration and severity of adverse events, since these factors are important to patients' decisions.

496 A valuable output of our systematic review is an open-source database of over 500 unique adverse  
497 events reported to date in non-randomized studies of medical cannabis or cannabinoids for chronic pain  
498 with corresponding assessments of risk of bias. This database was compiled in duplicate by trained and  
499 calibrated data extractors and is freely available to those interested in further analyzing the prevalence

500 of different types of adverse or to those interested in expanding the database to include adverse events  
501 in patients using medical cannabis or cannabinoids for other indications.

## 502 **Conclusion**

503 Our systematic review and meta-analysis found very low certainty evidence that suggests that adverse  
504 events are common among people living with chronic pain using medical cannabis or cannabinoids, but  
505 that serious adverse events, adverse events causing discontinuation, cognitive adverse events, motor  
506 vehicle accidents, falls, and dependence and withdrawal syndrome are uncommon. We also found very  
507 low certainty evidence that longer duration of use was associated more adverse events and that PEA,  
508 compared with other types of medical cannabis, may result in few or no adverse events. Future research  
509 should compare the risks of adverse events of medical cannabis and cannabinoids with alternative pain  
510 management options, including opioids, and adjust for potential confounders.

Table 1: Study characteristics

| Study                           | Design           | Country                                      | Condition                                                                      | Cannabis/<br>comparator | Dose                                                                                                                                                           | # of<br>participants | Duration of<br>cannabis use<br>(weeks)              |
|---------------------------------|------------------|----------------------------------------------|--------------------------------------------------------------------------------|-------------------------|----------------------------------------------------------------------------------------------------------------------------------------------------------------|----------------------|-----------------------------------------------------|
| Ware, 2003 <sup>35</sup>        | cross-sectional* | Canada                                       | mixed non-cancer pain                                                          | mixed herbal            | frequency: rarely (n=9), weekly (n=8), daily (n=5), >once daily (n=7)<br>dose: 1-2 puffs (n=4), 3-4 puffs (n=13), whole joint (n=8), more than one joint (n=4) | 32                   | NR                                                  |
| Lynch, 2006 <sup>36</sup>       | longitudinal*    | Canada                                       | mixed non-cancer pain                                                          | mixed herbal            | mean: 2.5 g/day                                                                                                                                                | 30                   | mean: 94.4                                          |
| Rog, 2007 <sup>37</sup>         | longitudinal*    | UK                                           | multiple sclerosis                                                             | nabiximols              | mean: 7.5 sprays/day                                                                                                                                           | 63                   | 66.1                                                |
| Weber, 2009 <sup>38</sup>       | longitudinal*†   | Germany                                      | mixed non-cancer pain                                                          | dronabinol              | median: 7.5 mg/day                                                                                                                                             | 172                  | mean: 31                                            |
| Bestard, 2011 <sup>39</sup>     | longitudinal*    | Canada                                       | peripheral neuropathic pain                                                    | nabilone                | mean: 3.0 mg/day                                                                                                                                               | 104                  | 24                                                  |
|                                 |                  |                                              |                                                                                | gabapentin              | mean: 2.3 g/day                                                                                                                                                | 107                  |                                                     |
| Fiz, 2011 <sup>40</sup>         | cross-sectional* | Spain                                        | fibromyalgia                                                                   | mixed herbal            | ~1 to 2 cigarettes or spoonful<br>daily (n=12) once every 2 to 4 days (n=5), less than twice a week (n=3), or occasionally (n=8)                               | 28                   | <52 (n=11), 52 to 156 (n=9), >156 weeks (n=8)       |
| Dominguez, 2012 <sup>41</sup>   | longitudinal*    | Spain                                        | lumbosciatica                                                                  | PEA                     | 300 mg bid                                                                                                                                                     | 64                   | 4                                                   |
| Gatti, 2012 <sup>42</sup>       | longitudinal††   | Italy                                        | mixed cancer and non-cancer pain                                               | PEA                     | 600 mg bid three weeks; 600 mg/day for four weeks                                                                                                              | 564                  | 7                                                   |
| Toth, 2012 <sup>43</sup>        | longitudinal*†   | Canada                                       | diabetic peripheral neuropathy                                                 | nabilone                | mean: 2.85 mg/day                                                                                                                                              | 37                   | 4                                                   |
| Schifilliti, 2014 <sup>44</sup> | longitudinal††   | Italy                                        | diabetic neuropathy                                                            | PEA                     | 300 mg bid                                                                                                                                                     | 30                   | 8.6                                                 |
| Storr, 2014 <sup>45</sup>       | cross-sectional* | Canada                                       | Crohn's disease (n=42), ulcerative colitis (n=10), indeterminate colitis (n=4) | mixed herbal            | NR                                                                                                                                                             | 56                   | <4 (n=3), 4 to 24 (n=9), 24 to 52 (n=5), >52 (n=32) |
| Del Giorno, 2015 <sup>46</sup>  | longitudinal††   | Italy                                        | fibromyalgia                                                                   | PEA                     | 600 mg bid first month; 300 mg bid in the next 2 months                                                                                                        | 35                   | 12                                                  |
| Hoggart, 2015 <sup>47</sup>     | longitudinal††   | UK, Czech Republic, Romania, Belgium, Canada | diabetic neuropathy                                                            | nabiximols              | median: 6 to 8 sprays/day                                                                                                                                      | 380                  | median: 35.6                                        |
| Ware, 2015 <sup>48</sup>        | longitudinal*†   | Canada                                       | mixed non-cancer pain                                                          | mixed herbal            | median: 2.5 g/day                                                                                                                                              | 215                  | 52                                                  |

|                                             |                   |                  |                                             |                 |                                                                                                                                                                                   |      |                      |
|---------------------------------------------|-------------------|------------------|---------------------------------------------|-----------------|-----------------------------------------------------------------------------------------------------------------------------------------------------------------------------------|------|----------------------|
|                                             |                   |                  |                                             | standard care   |                                                                                                                                                                                   | 216  |                      |
| <b>Haroutounian, 2016</b> <sup>49</sup>     | longitudinal*     | Israel           | mixed cancer and non-cancer pain            | mixed herbal    | mean: 43.2 g/month                                                                                                                                                                | 206  | 30                   |
| <b>Bellnier, 2017</b> <sup>50</sup>         | longitudinal*     | US               | mixed cancer and non-cancer pain            | mixed herbal    | Capsule: 10 mg /8 to 10 hours<br>Vapor pen inhaler for breakthrough pain: 2 mg THC, 0.1 mg CBD; 1 to 5 puffs every 15 minutes until pain relief; could be used every 4 to 6 hours | 29   | 12                   |
| <b>Cranford, 2017</b> <sup>51</sup>         | cross-sectional*  | US               | mixed non-cancer pain                       | NR              | 0 (n=69), <1/8 oz/week (n=130), 1/8 to 1/4 oz/week (n=156), 1/4 to 1/2 oz/week (n=179), 1/2 to 1 oz/week (n=122), 1 or more oz/week (n=115)                                       | 775  | NR                   |
| <b>Fanelli, 2017</b> <sup>52</sup>          | longitudinal††    | Italy            | mixed cancer and non-cancer pain            | mixed herbal    | mean: 69.5 mg/day bediol; 67.0 mg/day bedrocan                                                                                                                                    | 341  | mean: 14.01          |
| <b>Feingold, 2017</b> <sup>53</sup>         | cross-sectional*  | Israel           | mixed cancer and non-cancer pain            | mixed herbal    | NR                                                                                                                                                                                | 406  | NR                   |
| <b>Paladini, 2017</b> <sup>54</sup>         | longitudinal††    | Italy            | failed back surgery syndrome                | PEA             | 600 mg bid for one month; 600 mg/day for one month                                                                                                                                | 35   | 8                    |
| <b>Passavanti, 2017</b> <sup>55</sup>       | longitudinal††    | Italy            | lower back pain                             | PEA             | 600 mg bid                                                                                                                                                                        | 30   | 24                   |
| <b>Schimrigk, 2017</b> <sup>56</sup>        | longitudinal*†    | Germany, Austria | multiple sclerosis                          | dronabinol      | range: 7.5 to 15 mg/day                                                                                                                                                           | 209  | 32                   |
| <b>Chirchiglia, 2018</b> <sup>57</sup>      | longitudinal††    | Italy            | lower back pain                             | PEA             | 1.2 g/day                                                                                                                                                                         | 100  | 4                    |
| <b>Crowley, 2018</b> <sup>58</sup>          | longitudinal*     | US               | mixed non-cancer pain                       | Trokie lozenges | NR                                                                                                                                                                                | 35   | 4 to 60              |
| <b>Habib, 2018</b> <sup>59</sup>            | longitudinal*     | Israel           | fibromyalgia                                | mixed herbal    | mean: 26 g/month                                                                                                                                                                  | 26   | mean: 41.6           |
| <b>Anderson, 2019</b> <sup>60</sup>         | longitudinal*     | US               | cancer pain                                 | mixed herbal    | NR                                                                                                                                                                                | 1120 | 16                   |
| <b>Bonar, 2019</b> <sup>61</sup>            | cross-sectional†† | US               | mixed non-cancer pain                       | NR              | 0 (n=95), <1/8 oz/week (n=126), 1/8 to 1/4 oz/week (n=158), 1/4 to 1/2 oz/week (n=174), 1/2 to 1 oz/week (n=119), 1 or more oz/week (n=119)                                       | 790  | NR                   |
| <b>Cervigni, 2019</b> <sup>62</sup>         | longitudinal†     | Italy            | interstitial cystitis/bladder pain syndrome | PEA             | 400 mg m-PEA plus 40 mg polydatin bid for 3 months, od for 3 months                                                                                                               | 32   | 24                   |
| <b>Cremer-Schaeffer, 2019</b> <sup>63</sup> | longitudinal††    | Germany          | mixed cancer and non-cancer pain            | dronabinol      | NR                                                                                                                                                                                | 2017 | 52                   |
|                                             |                   |                  |                                             | mixed herbal    | NR                                                                                                                                                                                | 656  |                      |
|                                             |                   |                  |                                             | nabixim ols     | NR                                                                                                                                                                                | 393  |                      |
| <b>Lejczak, 2019</b> <sup>64</sup>          | longitudinal†     | France           | mixed cancer and non-cancer pain            | dronabinol      | range: 2.5 to 30 mg/day                                                                                                                                                           | 148  | range: 4 to 24 weeks |
| <b>Loi, 2019</b> <sup>65</sup>              | longitudinal*     | Italy            | endometriosis                               | PEA             | 600 mg/bid for 10 days; 400 mg m-PEA plus 40 mg polydatin bid                                                                                                                     | 28   | 12.9                 |
| <b>Naftali, 2019</b> <sup>66</sup>          | longitudinal*     | Israel           | inflammatory bowel disease                  | mixed herbal    | mean: 31 g/month                                                                                                                                                                  | 127  | median: 176          |

|                                     |                  |           |                                                                                                                                                                                                                                                                                                                                                    |              | mean: 21 g/day THC; 170 g/day CBD                                                                                                                                     |     |            |
|-------------------------------------|------------------|-----------|----------------------------------------------------------------------------------------------------------------------------------------------------------------------------------------------------------------------------------------------------------------------------------------------------------------------------------------------------|--------------|-----------------------------------------------------------------------------------------------------------------------------------------------------------------------|-----|------------|
| <b>Perron, 2019</b> <sup>67</sup>   | cross-sectional* | US        | mixed non-cancer pain                                                                                                                                                                                                                                                                                                                              | NR           | daily (n=580), weekly (n=85)                                                                                                                                          | 618 | ≥12        |
| <b>Sagy, 2019</b> <sup>68</sup>     | longitudinal††   | Israel    | mixed cancer and non-cancer pain                                                                                                                                                                                                                                                                                                                   | mixed herbal | median: 1000 mg/day cannabis                                                                                                                                          | 239 | 24         |
| <b>Sinclair, 2019</b> <sup>69</sup> | cross-sectional* | Australia | endometriosis                                                                                                                                                                                                                                                                                                                                      | mixed herbal | median: 140 mg/day THC; 39 mg/day CBD<br>less than once per week (n=12), once per week (n=6), two to six times per week (n=9), daily or multiple times per day (n=21) | 48  | NR         |
| <b>Ueberall, 2019</b> <sup>70</sup> | longitudinal*    | Germany   | low back pain (n=234), failed back surgery syndrome (n=148), shoulder/neck pain (n=91), post-herpetic neuralgia (n=72), peripheral diabetic neuropathy (n=56), brachial plexus injury (n=48), lumbar spinal stenosis (n=38), cancer (n=31), fibromyalgia (n=26), peripheral/focal nerve lesions (n=22), phantom pain (n=19), osteoarthritis (n=15) | nabiximols   | mean: 7.1 sprays/day                                                                                                                                                  | 800 | 12         |
| <b>Vigil, 2017</b> <sup>71</sup>    | longitudinal*    | US        | mixed non-cancer pain                                                                                                                                                                                                                                                                                                                              | NR           | NR                                                                                                                                                                    | 37  | mean: 82.4 |
| <b>Yassin, 2019</b> <sup>72</sup>   | longitudinal††   | Israel    | fibromyalgia                                                                                                                                                                                                                                                                                                                                       | mixed herbal | 20 to 30 g/month                                                                                                                                                      | 31  | 24         |
| <b>Giorgi, 2020</b> <sup>73</sup>   | longitudinal††   | Italy     | fibromyalgia                                                                                                                                                                                                                                                                                                                                       | extracts     | 10 to 30 drops/day; no more than 120 drops/day                                                                                                                        | 102 | 24         |

NR=not reported

\*Patient-report

†Clinician-report

††NR

513

514

515

**Table 2: Prevalence of adverse events from non-comparative studies**

| Outcome                                       | Number of studies | Number of participants | Duration of follow-up (weeks)       | Prevalence % (95% CI)                                                                                                                                                                                                                                                                                                                               | I <sup>2</sup> (%) | Certainty | Reasons for downgrading                             |
|-----------------------------------------------|-------------------|------------------------|-------------------------------------|-----------------------------------------------------------------------------------------------------------------------------------------------------------------------------------------------------------------------------------------------------------------------------------------------------------------------------------------------------|--------------------|-----------|-----------------------------------------------------|
| <b>All adverse events</b>                     | 22                | 4,108                  | 4 to 94                             | The prevalence of adverse events ranged between 0% to 92.1%. Studies with less than 24 weeks of cannabis use typically reported fewer adverse events than those with more than 24 weeks. Patients using PEA experienced no adverse events. The evidence was overall very uncertain due to risk of bias and inconsistency.                           |                    | very low  | risk of bias (3 levels), inconsistency              |
| <b>Adverse events causing discontinuation</b> | 20                | 6,509                  | 4 to 66                             | The prevalence of discontinuations due to adverse events ranged between 0% to 27.0%. Studies with less than 24 weeks of cannabis use typically reported fewer discontinuations than those with more than 24 weeks. Patients using PEA experienced no adverse events. The evidence was overall very uncertain due to risk of bias and inconsistency. |                    | very low  | risk of bias (3 levels), inconsistency              |
| <b>Serious adverse events</b>                 | 24                | 4,273                  | 4 to 94                             | 1.2 (0.1 to 3.1)                                                                                                                                                                                                                                                                                                                                    | 91                 | very low  | risk of bias (3 levels)                             |
| <b>Psychiatric adverse events</b>             |                   |                        |                                     |                                                                                                                                                                                                                                                                                                                                                     |                    |           |                                                     |
| Psychiatric disorder                          | 4                 | 1,458                  | 12 to 66                            | 13.5 (2.6 to 30.6)                                                                                                                                                                                                                                                                                                                                  | 98                 | very low  | risk of bias (3 levels), inconsistency, imprecision |
| Suicide                                       | 1                 | 215                    | 52                                  | 0 (0 to 0.8)                                                                                                                                                                                                                                                                                                                                        | NA                 | very low  | risk of bias (3 levels)                             |
| Suicidal thoughts                             | 1                 | 3,066                  | 52                                  | 0.1 (0 to 0.5)                                                                                                                                                                                                                                                                                                                                      | 44                 | very low  | risk of bias (3 levels)                             |
| Depression                                    | 6                 | 4,144                  | 12 to 66                            | 1.7 (0.9 to 2.7)                                                                                                                                                                                                                                                                                                                                    | 71                 | very low  | risk of bias (3 levels)                             |
| Mania                                         | 1                 | 215                    | 52                                  | 0.5 (0 to 2)                                                                                                                                                                                                                                                                                                                                        | NA                 | very low  | risk of bias (3 levels)                             |
| Hallucinations                                | 6                 | 3,583                  | 24 to 66                            | 0.5 (0.1 to 1.3)                                                                                                                                                                                                                                                                                                                                    | 69                 | very low  | risk of bias (3 levels)                             |
| Delusions                                     | 4                 | 3,281                  | 52                                  | 0.4 (0.2 to 0.6)                                                                                                                                                                                                                                                                                                                                    | 0                  | very low  | risk of bias (3 levels)                             |
| Paranoia                                      | 3                 | 277                    | 52 to 94; one cross-sectional study | 5.6 (0 to 19.2)                                                                                                                                                                                                                                                                                                                                     | 85                 | very low  | risk of bias (3 levels), inconsistency, imprecision |

|                                  |   |       |                                          |                     |    |          |                                                                   |
|----------------------------------|---|-------|------------------------------------------|---------------------|----|----------|-------------------------------------------------------------------|
| Anxiety                          | 5 | 1,695 | 12 to 94;<br>two cross-sectional studies | 7.4 (0 to 26.9)     | 99 | very low | risk of bias (3 levels), imprecision                              |
| Euphoria                         | 7 | 4,501 | 4 to 66                                  | 2.1 (0.9 to 3.8)    | 96 | very low | risk of bias (3 levels)                                           |
| <b>Cognitive adverse events</b>  |   |       |                                          |                     |    |          |                                                                   |
| Memory impairment                | 6 | 4,484 | 4 to 176                                 | 5.3 (2.1 to 9.6)    | 96 | very low | risk of bias (3 levels)                                           |
| Confusion                        | 7 | 1,654 | 4 to 176                                 | 1.8 (0.3 to 4.2)    | 81 | very low | risk of bias (3 levels)                                           |
| Disorientation                   | 6 | 4,485 | 12 to 52                                 | 1.6 (0.6 to 3.0)    | 88 | very low | risk of bias (3 levels)                                           |
| Attention disorder or deficit    | 8 | 5,477 | 12 to 82                                 | 3.4 (1.3 to 6.3)    | 95 | very low | risk of bias (3 levels)                                           |
| <b>Accidents and injuries</b>    |   |       |                                          |                     |    |          |                                                                   |
| Falls                            | 1 | 215   | 52                                       | 2.3 (0.7 to 4.9)    | NA | very low | risk of bias (3 levels)                                           |
| Motor vehicle accidents          | 1 | 215   | 52                                       | 0.5 (0 to 2.0)      | NA | very low | risk of bias (3 levels)                                           |
| <b>Dependence and withdrawal</b> |   |       |                                          |                     |    |          |                                                                   |
| Dependence                       | 3 | 1,824 | 12; one cross-sectional study            | 4.4 (0.0 to 19.9)   | 99 | very low | risk of bias (3 levels), inconsistency, imprecision, indirectness |
| Withdrawal syndrome              | 2 | 424   | 32 to 52                                 | 2.1 (0 to 8.2)      | 89 | very low | risk of bias (3 levels), indirectness                             |
| Withdrawal symptoms              | 1 | 618   | NA; cross-sectional                      | 67.8 (64.1 to 71.4) | NA | very low | risk of bias (3 levels), indirectness                             |



**Table 3: Risk differences for adverse events from comparative studies**

| Outcome                                | Exposure                          | Number of studies | Number of participants | Follow-up (weeks) | Risk with cannabis (/1000) | Risk with comparator (/1000) | Risk difference (95% CI) | Certainty | Reasons for downgrading              |
|----------------------------------------|-----------------------------------|-------------------|------------------------|-------------------|----------------------------|------------------------------|--------------------------|-----------|--------------------------------------|
| All adverse events                     | Nabilone vs. gabapentin           | 1                 | 220                    | 24                | 404                        | 534                          | -13.1% (-26.2 to 0)      | Very low  | Risk of bias (2 levels), imprecision |
| Adverse events causing discontinuation | Herbal cannabis vs. standard care | 1                 | 431                    | 52                | 47                         | 0                            | 4.7% (1.8 to 7.5)        | Low       | Risk of bias (2 levels),             |
|                                        | Nabilone vs. gabapentin           | 1                 | 220                    | 24                | 96                         | 190                          | -9.4% (-18.5 to -0.2)    | Very low  | Risk of bias (2 levels), imprecision |
| Serious                                | Herbal cannabis vs. standard care | 1                 | 431                    | 52                | 130                        | 194                          | 1.5% (-8.3 to 20.2) *    | Low       | Risk of bias, imprecision            |
|                                        | Nabilone vs. gabapentin           | 1                 | 220                    | 24                | 0                          | 0                            | 0% (0 to 0)              | Very low  | Risk of bias (2 levels), imprecision |
| Psychiatric disorder                   | Herbal cannabis vs. standard care | 1                 | 431                    | 52                | 219                        | 97                           | 16.9% (5.8 to 40.5) †    | Very low  | Risk of bias (2 levels), imprecision |
| Suicide                                | Herbal cannabis vs. standard care | 1                 | 431                    | 52                | 0                          | 5                            | -0.5% (-1.4 to 0.4)      | Low       | Risk of bias (2 levels)              |
| Mania                                  | Herbal cannabis vs. standard care | 1                 | 431                    | 52                | 5                          | 0                            | 0.5% (-0.4 to 1.4)       | Low       | Risk of bias (2 levels)              |
| Hallucinations                         | Herbal cannabis vs. standard care | 1                 | 431                    | 52                | 5                          | 0                            | 0.5% (-0.4 to 1.4)       | Low       | Risk of bias (2 levels)              |
| Delusions                              | Herbal cannabis vs. standard care | 1                 | 431                    | 52                | 0                          | 5                            | -0.5% (-1.4 to 0.4)      | Low       | Risk of bias (2 levels)              |
| Depression                             | Herbal cannabis vs. standard care | 1                 | 431                    | 52                | 47                         | 46                           | 0.1% (-4 to 4)           | Low       | Risk of bias (2 levels)              |
| Paranoia                               | Herbal cannabis vs. standard care | 1                 | 431                    | 52                | 9                          | 0                            | 0.9% (-0.4 to 2.2)       | Low       | Risk of bias (2 levels)              |
| Anxiety                                | Herbal cannabis vs. standard care | 1                 | 431                    | 52                | 47                         | 9                            | 3.8% (0.6 to 6.8)        | Low       | Risk of bias (2 levels)              |
| Euphoria                               | Herbal cannabis vs. standard care | 1                 | 431                    | 52                | 42                         | 0                            | 4.2% (1.5 to 6.9)        | Low       | Risk of bias (2 levels)              |

|                                 |                                   |   |     |    |    |    |                     |          |                          |
|---------------------------------|-----------------------------------|---|-----|----|----|----|---------------------|----------|--------------------------|
| <b>Memory impairment</b>        | Herbal cannabis vs. standard care | 1 | 431 | 52 | 19 | 0  | 1.9% (0.1 to 3.7)   | Low      | Risk of bias (2 levels)  |
| <b>Confusion</b>                | Herbal cannabis vs. standard care | 1 | 431 | 52 | 14 | 19 | -0.5% (-2.8 to 1.9) | Low      | Risk of bias (2 levels)  |
| <b>Disturbance in attention</b> | Herbal cannabis vs. standard care | 1 | 431 | 52 | 23 | 9  | 1.4% (-1 to 3.8)    | Low      | Risk of bias (2 levels)  |
| <b>Falls</b>                    | Herbal cannabis vs. standard care | 1 | 431 | 52 | 23 | 23 | 0% (-2.8 to 2.9)    | Low      | Risk of bias (2 levels)  |
| <b>Motor vehicle accidents</b>  | Herbal cannabis vs. standard care | 1 | 431 | 52 | 5  | 0  | 0.5% (-0.4 to 1.4)  | Low      | Risk of bias (2 levels)  |
| <b>Withdrawal syndrome</b>      | Herbal cannabis vs. standard care | 1 | 431 | 52 | 5  | 0  | 0.5% (-0.4 to 1.4)  | Very low | Risk of bias (2 levels), |

\* Risk difference calculated from adjusted incident rate ratio reported in study.

† Risk difference calculated from unadjusted incident rate ratio reported in study.

516 **Figures**

517 **Figure 1: Study selection process**

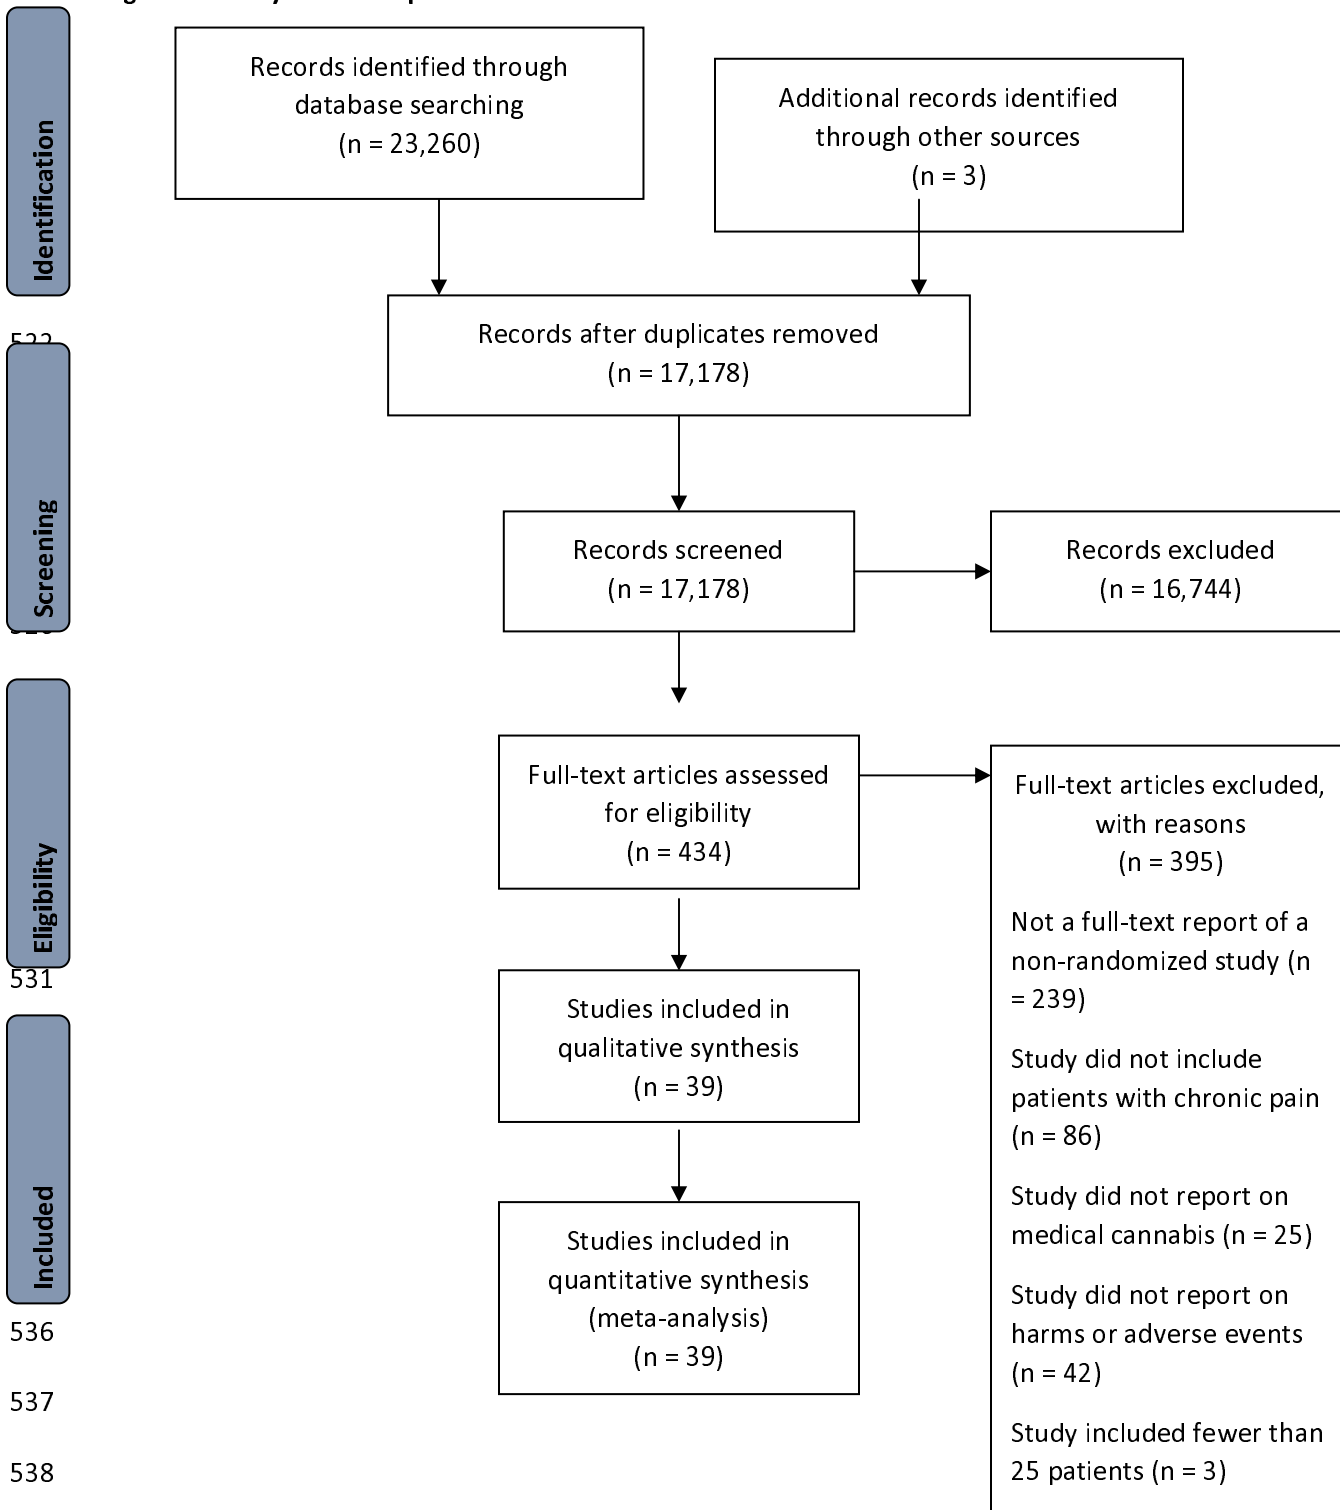

536

537

538

539

540 **Figure 2: Forest plot of the meta-analysis for all adverse events stratified by type of medical cannabis**

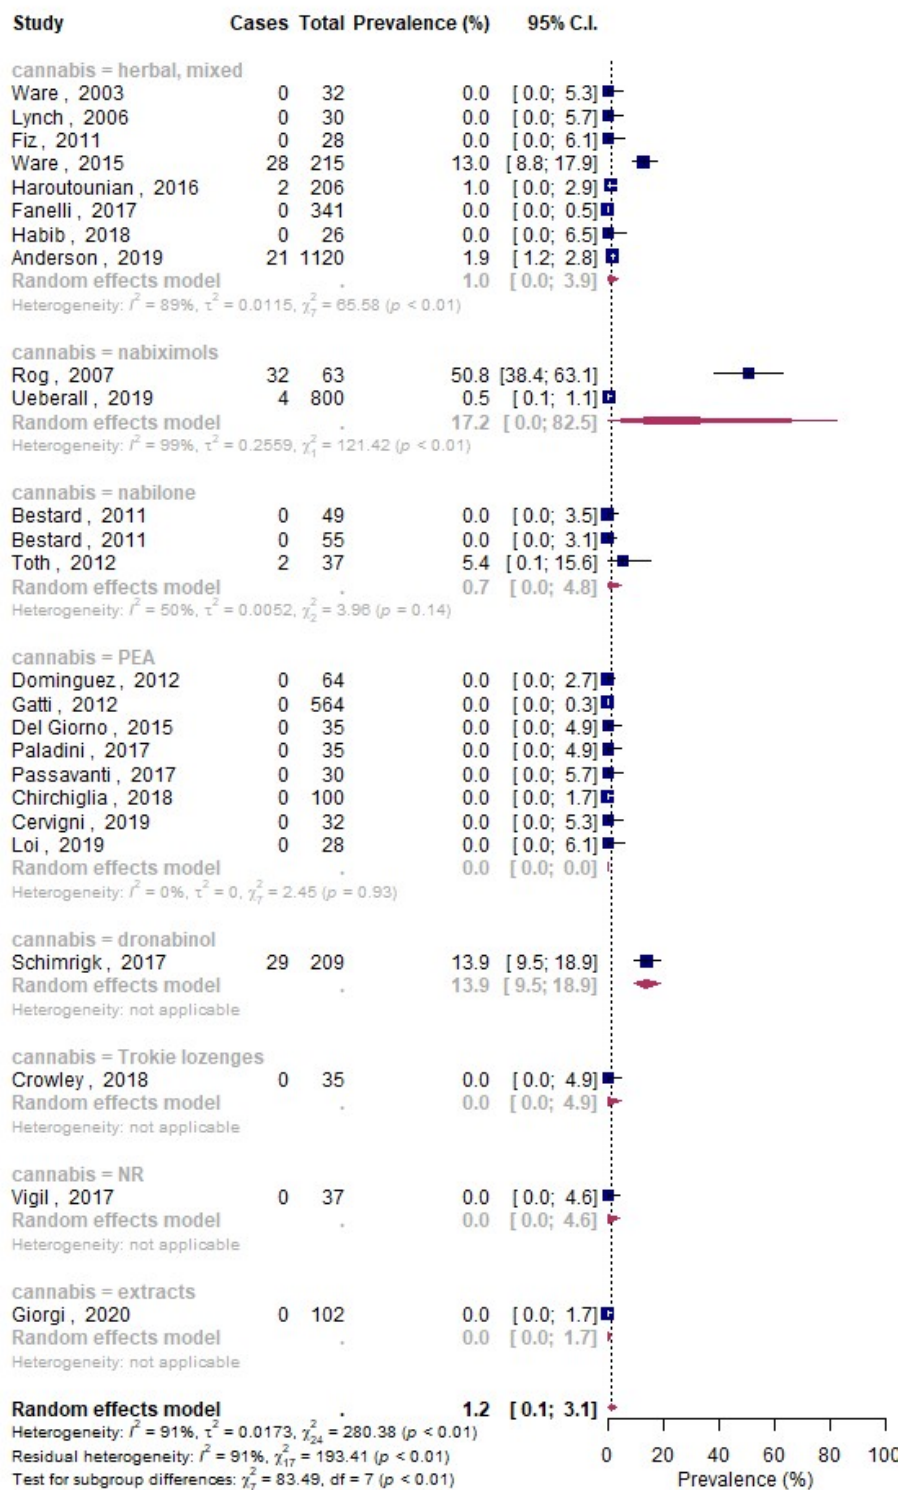

541

542

543

544 **References**

- 545 1. Mills SEE, Nicolson KP, Smith BH. Chronic pain: a review of its epidemiology and associated factors in  
546 population-based studies. *Br J Anaesth* 2019;123(2):e273-e83. doi: 10.1016/j.bja.2019.03.023  
547 [published Online First: 2019/05/14]
- 548 2. Mills SEE, van Hecke O, Smith BH. Handbook of Pain and Palliative Care: Biopsychosocial and  
549 Environmental Approaches for the Life Course. 2019.
- 550 3. Keyhani S, Steigerwald S, Ishida J, et al. Risks and Benefits of Marijuana Use: A National Survey of U.S.  
551 Adults. *Ann Intern Med* 2018;169(5):282-90. doi: 10.7326/m18-0810 [published Online First:  
552 2018/07/25]
- 553 4. Dai H, Richter KP. A National Survey of Marijuana Use Among US Adults With Medical Conditions,  
554 2016-2017. *JAMA Netw Open* 2019;2(9):e1911936. doi: 10.1001/jamanetworkopen.2019.11936  
555 [published Online First: 2019/09/21]
- 556 5. National Academies of Sciences E, Medicine, Health, et al. The National Academies Collection: Reports  
557 funded by National Institutes of Health. The Health Effects of Cannabis and Cannabinoids: The  
558 Current State of Evidence and Recommendations for Research. Washington (DC): National  
559 Academies Press (US)
- 560 Copyright 2017 by the National Academy of Sciences. All rights reserved. 2017.
- 561 6. Carr D, Schatman M. Cannabis for Chronic Pain: Not Ready for Prime Time. *American Journal of Public*  
562 *Health* 2019;109(1):50-51. doi: 10.2105/AJPH.2018.304593 [published Online First: 2019/01/]
- 563 7. Ziemianski D, Capler R, Tekanoff R, et al. Cannabis in medicine: a national educational needs  
564 assessment among Canadian physicians. *BMC Med Educ* 2015;15:52. doi: 10.1186/s12909-015-  
565 0335-0 [published Online First: 2015/04/19]
- 566 8. Kahan M, Srivastava A. Is there a role for marijuana in medical practice? No. *Can Fam Physician*  
567 2007;53(1):22-5. [published Online First: 2007/09/18]
- 568 9. Ware MA. Is there a role for marijuana in medical practice? Yes. *Can Fam Physician* 2007;53(1):22-5.  
569 [published Online First: 2007/09/18]
- 570 10. Deshpande A, Mailis-Gagnon A, Zoheiry N, et al. Efficacy and adverse effects of medical marijuana  
571 for chronic noncancer pain: Systematic review of randomized controlled trials. *Can Fam*  
572 *Physician* 2015;61(8):e372-81. [published Online First: 2015/10/28]
- 573 11. Wang L, Hong P, May C, et al. Medical cannabis for chronic pain: a systematic review and meta-  
574 analysis of randomized clinical trials. *BMJ* 2020;Submitted
- 575 12. Wang T, Collet JP, Shapiro S, et al. Adverse effects of medical cannabinoids: a systematic review.  
576 *Cmaj* 2008;178(13):1669-78. doi: 10.1503/cmaj.071178 [published Online First: 2008/06/19]
- 577 13. Whiting PF, Wolff RF, Deshpande S, et al. Cannabinoids for Medical Use: A Systematic Review and  
578 Meta-analysis. *Jama* 2015;313(24):2456-73. doi: 10.1001/jama.2015.6358 [published Online  
579 First: 2015/06/24]
- 580 14. Hill KP, Hurley-Welljams-Dorof WM. Low to moderate quality evidence demonstrates the potential  
581 benefits and adverse events of cannabinoids for certain medical indications. *Evid Based Med*  
582 2016;21(1):17. doi: 10.1136/ebmed-2015-110264 [published Online First: 2015/10/23]
- 583 15. Bair MJ, Robinson RL, Katon W, et al. Depression and pain comorbidity: a literature review. *Arch*  
584 *Intern Med* 2003;163(20):2433-45. doi: 10.1001/archinte.163.20.2433 [published Online First:  
585 2003/11/12]
- 586 16. Magni G, Marchetti M, Moreschi C, et al. Chronic musculoskeletal pain and depressive symptoms in  
587 the National Health and Nutrition Examination. I. Epidemiologic follow-up study. *Pain*  
588 1993;53(2):163-8. doi: 10.1016/0304-3959(93)90076-2 [published Online First: 1993/05/01]

- 589 17. Wilson KG, Eriksson MY, D'Eon JL, et al. Major depression and insomnia in chronic pain. *Clin J Pain*  
590 2002;18(2):77-83. doi: 10.1097/00002508-200203000-00002 [published Online First:  
591 2002/03/08]
- 592 18. Siemieniuk RA, Agoritsas T, Macdonald H, et al. Introduction to BMJ Rapid Recommendations. *Bmj*  
593 2016;354:i5191. doi: 10.1136/bmj.i5191 [published Online First: 2016/09/30]
- 594 19. Zeng L, Lytvyn L, Wang X, et al. Values and preferences towards medical cannabis among patients  
595 with chronic pain: A mixed methods systematic review. *BMJ* 2020;Submitted
- 596 20. Noori A, Miroshnychenko A, Shergill Y, et al. Opioid-Sparing effects of medical cannabis for chronic  
597 pain: A systematic review and meta-analysis of randomized and observational studies. *BMJ*  
598 2020;Submitted
- 599 21. Busse J, Vankrunkelsven P, Zeng L, et al. Medical cannabis for chronic pain: a clinical practice  
600 guideline. *BMJ* 2020;Submitted.
- 601 22. Zorzela L, Loke YK, Ioannidis JP, et al. PRISMA harms checklist: improving harms reporting in  
602 systematic reviews. *Bmj* 2016;352:i157. doi: 10.1136/bmj.i157 [published Online First:  
603 2016/02/03]
- 604 23. Busse JW, Bartlett SJ, Dougados M, et al. Optimal Strategies for Reporting Pain in Clinical Trials and  
605 Systematic Reviews: Recommendations from an OMERACT 12 Workshop. *J Rheumatol*  
606 2015;42(10):1962-70. doi: 10.3899/jrheum.141440 [published Online First: 2015/05/17]
- 607 24. Sterne JA, Hernán MA, Reeves BC, et al. ROBINS-I: a tool for assessing risk of bias in non-randomised  
608 studies of interventions. *Bmj* 2016;355:i4919. doi: 10.1136/bmj.i4919 [published Online First:  
609 2016/10/14]
- 610 25. Freeman MF, Tukey JW. Transformations related to the angular and the square root. *The Annals of*  
611 *Mathematical Statistics* 1950:607-11.
- 612 26. DerSimonian R, Laird N. Meta-analysis in clinical trials. *Controlled clinical trials* 1986;7(3):177-88.
- 613 27. Murad M, Montori V, Ioannidis J, et al. Fixed-effects and random-effects models. *Users' guide to the*  
614 *medical literature A manual for evidence-based clinical practice McGraw-Hill, 3rd ed New York,*  
615 *America* 2015
- 616 28. Rücker G, Schwarzer G, Carpenter JR, et al. Undue reliance on I(2) in assessing heterogeneity may  
617 mislead. *BMC Med Res Methodol* 2008;8:79. doi: 10.1186/1471-2288-8-79 [published Online  
618 First: 2008/11/28]
- 619 29. Sun X, Briel M, Walter SD, et al. Is a subgroup effect believable? Updating criteria to evaluate the  
620 credibility of subgroup analyses. *Bmj* 2010;340:c117. doi: 10.1136/bmj.c117 [published Online  
621 First: 2010/04/01]
- 622 30. Schandelmaier S, Briel M, Varadhan R, et al. Development of the Instrument to assess the Credibility  
623 of Effect Modification Analyses (ICEMAN) in randomized controlled trials and meta-analyses.  
624 *Cmaj* 2020;192(32):E901-e06. doi: 10.1503/cmaj.200077 [published Online First: 2020/08/12]
- 625 31. Schwarzer G. meta: An R package for meta-analysis. *R news* 2007;7(3):40-45.
- 626 32. Schünemann HJ, Cuello C, Akl EA, et al. GRADE guidelines: 18. How ROBINS-I and other tools to  
627 assess risk of bias in nonrandomized studies should be used to rate the certainty of a body of  
628 evidence. *J Clin Epidemiol* 2019;111:105-14. doi: 10.1016/j.jclinepi.2018.01.012 [published  
629 Online First: 2018/02/13]
- 630 33. Guyatt GH, Oxman AD, Vist GE, et al. GRADE: an emerging consensus on rating quality of evidence  
631 and strength of recommendations. *Bmj* 2008;336(7650):924-6. doi:  
632 10.1136/bmj.39489.470347.AD [published Online First: 2008/04/26]
- 633 34. Santesso N, Glenton C, Dahm P, et al. GRADE guidelines 26: informative statements to communicate  
634 the findings of systematic reviews of interventions. *J Clin Epidemiol* 2020;119:126-35. doi:  
635 10.1016/j.jclinepi.2019.10.014 [published Online First: 2019/11/13]

- 636 35. Ware MA, Doyle CR, Woods R, et al. Cannabis use for chronic non-cancer pain: results of a  
637 prospective survey. *Pain* 2003;102(1-2):211-6.
- 638 36. Lynch ME, Young J, Clark AJ. A case series of patients using medicinal marijuana for management of  
639 chronic pain under the Canadian Marijuana Medical Access Regulations. *Journal of Pain &*  
640 *Symptom Management* 2006;32(5):497-501.
- 641 37. Rog DJ, Nurmikko TJ, Young CA. Oromucosal delta9-tetrahydrocannabinol/cannabidiol for  
642 neuropathic pain associated with multiple sclerosis: an uncontrolled, open-label, 2-year  
643 extension trial. *Clinical Therapeutics* 2007;29(9):2068-79.
- 644 38. Weber J, Schley M, Casutt M, et al. Tetrahydrocannabinol (Delta 9-THC) treatment in chronic central  
645 neuropathic pain and fibromyalgia patients: Results of a multicenter survey. *Anesthesiology*  
646 *Research and Practice* 2009;2009 (no pagination)(827290) doi:  
647 <http://dx.doi.org/10.1155/2009/827290>
- 648 39. Bestard JA, Toth CC. An open-label comparison of nabilone and gabapentin as adjuvant therapy or  
649 monotherapy in the management of neuropathic pain in patients with peripheral neuropathy.  
650 *Pain Practice* 2011;11(4):353-68. doi: <https://dx.doi.org/10.1111/j.1533-2500.2010.00427.x>
- 651 40. Fiz J, Duran M, Capella D, et al. Cannabis use in patients with Fibromyalgia: Effect on symptoms relief  
652 and health-related quality of life. *PLoS ONE* 2011;6 (4) (no pagination)(e18440) doi:  
653 <http://dx.doi.org/10.1371/journal.pone.0018440>
- 654 41. Domínguez CM, Martín AD, Ferrer FG, et al. N-palmitoylethanolamide in the treatment of  
655 neuropathic pain associated with lumbosciatica. *Pain Manag* 2012;2(2):119-24. doi:  
656 10.2217/pmt.12.5 [published Online First: 2012/03/01]
- 657 42. Gatti A, Lazzari M, Gianfelice V, et al. Palmitoylethanolamide in the treatment of chronic pain caused  
658 by different etiopathogenesis. *Pain Medicine* 2012;13(9):1121-30. doi:  
659 <https://dx.doi.org/10.1111/j.1526-4637.2012.01432.x>
- 660 43. Toth C, Mawani S, Brady S, et al. An enriched-enrolment, randomized withdrawal, flexible-dose,  
661 double-blind, placebo-controlled, parallel assignment efficacy study of nabilone as adjuvant in  
662 the treatment of diabetic peripheral neuropathic pain. *Pain* 2012;153(10):2073-82. doi:  
663 <http://dx.doi.org/10.1016/j.pain.2012.06.024>
- 664 44. Schifilliti C, Cucinotta L, Fedele V, et al. Micronized palmitoylethanolamide reduces the symptoms of  
665 neuropathic pain in diabetic patients. *Pain Res Treat* 2014;2014:849623. doi:  
666 10.1155/2014/849623 [published Online First: 2014/05/08]
- 667 45. Storr M, Devlin S, Kaplan GG, et al. Cannabis use provides symptom relief in patients with  
668 inflammatory bowel disease but is associated with worse disease prognosis in patients with  
669 Crohn's disease. *Inflammatory Bowel Diseases* 2014;20(3):472-80. doi:  
670 <https://dx.doi.org/10.1097/01.MIB.0000440982.79036.d6>
- 671 46. Del Giorno R, Skaper S, Paladini A, et al. Palmitoylethanolamide in Fibromyalgia: Results from  
672 Prospective and Retrospective Observational Studies. *Pain and Therapy* 2015;4(2):169-78. doi:  
673 <http://dx.doi.org/10.1007/s40122-015-0038-6>
- 674 47. Hoggart B, Ratcliffe S, Ehler E, et al. A multicentre, open-label, follow-on study to assess the long-  
675 term maintenance of effect, tolerance and safety of THC/CBD oromucosal spray in the  
676 management of neuropathic pain. *Journal of Neurology* 2015;262(1):27-40. doi:  
677 <https://dx.doi.org/10.1007/s00415-014-7502-9>
- 678 48. Ware MA, Wang T, Shapiro S, et al. Cannabis for the Management of Pain: Assessment of Safety  
679 Study (COMPASS). *Journal of Pain* 2015;16(12):1233-42. doi:  
680 <https://dx.doi.org/10.1016/j.jpain.2015.07.014>
- 681 49. Haroutounian S, Ratz Y, Ginosar Y, et al. The Effect of Medicinal Cannabis on Pain and Quality-of-Life  
682 Outcomes in Chronic Pain: A Prospective Open-label Study. *Clinical Journal of Pain*  
683 2016;32(12):1036-43.

- 684 50. Bellnier T, Brown G, Ortega T, et al. A preliminary evaluation of the efficacy, safety, and costs  
685 associated with the treatment of chronic pain with medical marijuana in the elderly. *Consultant*  
686 *Pharmacist* 2017;32 (10):597. doi: <http://dx.doi.org/10.4140/TCPn.2017.577>
- 687 51. Cranford JA, Arnedt JT, Conroy DA, et al. Prevalence and correlates of sleep-related problems in  
688 adults receiving medical cannabis for chronic pain. *Drug & Alcohol Dependence* 2017;180:227-  
689 33. doi: <https://dx.doi.org/10.1016/j.drugalcdep.2017.08.017>
- 690 52. Fanelli G, De Carolis G, Leonardi C, et al. Cannabis and intractable chronic pain: an explorative  
691 retrospective analysis of Italian cohort of 614 patients. *Journal of pain research* 2017;10:1217-  
692 24. doi: <https://dx.doi.org/10.2147/JPR.S132814>
- 693 53. Feingold D, Goor-Aryeh I, Bril S, et al. Problematic Use of Prescription Opioids and Medicinal  
694 Cannabis Among Patients Suffering from Chronic Pain. *Pain Medicine* 2017;18(2):294-306. doi:  
695 <https://dx.doi.org/10.1093/pm/pnw134>
- 696 54. Paladini A, Varrassi G, Bentivegna G, et al. Palmitoylethanolamide in the Treatment of Failed Back  
697 Surgery Syndrome. *Pain Res Treat* 2017;2017:1486010. doi: 10.1155/2017/1486010 [published  
698 Online First: 2017/09/07]
- 699 55. Passavanti MB, Fiore M, Sansone P, et al. The beneficial use of ultramicrozoned  
700 palmitoylethanolamide as add-on therapy to Tapentadol in the treatment of low back pain: a  
701 pilot study comparing prospective and retrospective observational arms. *BMC Anesthesiology*  
702 2017;17(1):171. doi: <https://dx.doi.org/10.1186/s12871-017-0461-9>
- 703 56. Schimrigk S, Marziniak M, Neubauer C, et al. Dronabinol Is a Safe Long-Term Treatment Option for  
704 Neuropathic Pain Patients. *European Neurology* 2017;78(5-6):320-29. doi:  
705 <https://dx.doi.org/10.1159/000481089>
- 706 57. Chirchiglia D, Chirchiglia P, Signorelli F. Nonsurgical lumbar radiculopathies treated with  
707 ultramicrozoned palmitoylethanolamide (umPEA): A series of 100 cases. *Neurologia i*  
708 *Neurochirurgia Polska* 2018;52(1):44-47. doi: <https://dx.doi.org/10.1016/j.pjnns.2017.11.002>
- 709 58. Crowley K, de Vries ST, Moreno-Sanz G. Self-Reported Effectiveness and Safety of Trokie R Lozenges:  
710 A Standardized Formulation for the Buccal Delivery of Cannabis Extracts. *Frontiers in*  
711 *Neuroscience* 2018;12:564. doi: <https://dx.doi.org/10.3389/fnins.2018.00564>
- 712 59. Habib G, Artul S. Medical Cannabis for the Treatment of Fibromyalgia. *JCR: Journal of Clinical*  
713 *Rheumatology* 2018;24(5):255-58. doi: <https://dx.doi.org/10.1097/RHU.0000000000000702>
- 714 60. Anderson SP, Zylla DM, McGriff DM, et al. Impact of medical cannabis on patient-reported symptoms  
715 for patients with cancer enrolled in Minnesota's medical cannabis program. *Journal of Oncology*  
716 *Practice* 2019;15(6):E338-E45. doi: <http://dx.doi.org/10.1200/JOP.18.00619>
- 717 61. Bonar EE, Cranford JA, Arterberry BJ, et al. Driving under the influence of cannabis among medical  
718 cannabis patients with chronic pain. *Drug & Alcohol Dependence* 2019;195:193-97. doi:  
719 <https://dx.doi.org/10.1016/j.drugalcdep.2018.11.016>
- 720 62. Cervigni M, Nasta L, Schievano C, et al. Micronized Palmitoylethanolamide-Polydatin Reduces the  
721 Painful Symptomatology in Patients with Interstitial Cystitis/Bladder Pain Syndrome. *BioMed*  
722 *Research International* 2019;2019 (no pagination)(9828397) doi:  
723 <http://dx.doi.org/10.1155/2019/9828397>
- 724 63. Cremer-Schaeffer P, Schmidt-Wolf G, Broich K. [Cannabis medicines in pain management : Interim  
725 analysis of the survey accompanying the prescription of cannabis-based medicines in Germany  
726 with regard to pain as primarily treated symptom]. *Der Schmerz* 2019;33(5):415-23. doi:  
727 <https://dx.doi.org/10.1007/s00482-019-00399-z>
- 728 64. Lejczak S, Rousselot H, Di Patrizio P, et al. Dronabinol use in France between 2004 and 2017. *Revue*  
729 *Neurologique* 2019;175(5):298-304. doi: <https://dx.doi.org/10.1016/j.neurol.2018.07.011>
- 730 65. Loi ES, Pontis A, Cofelice V, et al. Effect of ultramicrozoned-palmitoylethanolamide and co-  
731 micronizedpalmitoylethanolamide/polydatin on chronic pelvic pain and quality of life in



- 732 endometriosis patients: An open-label pilot study. *International Journal of Women's Health*  
733 2019;11:443-49. doi: <http://dx.doi.org/10.2147/IJWH.S204275>
- 734 66. Naftali T, Bar-Lev Schleider L, Sklerovsky Benjaminov F, et al. Medical cannabis for inflammatory  
735 bowel disease: real-life experience of mode of consumption and assessment of side-effects.  
736 *European Journal of Gastroenterology & Hepatology* 2019;31(11):1376-81. doi:  
737 <https://dx.doi.org/10.1097/MEG.0000000000001565>
- 738 67. Perron BE, Holt KR, Yeagley E, et al. Mental health functioning and severity of cannabis withdrawal  
739 among medical cannabis users with chronic pain. *Drug & Alcohol Dependence* 2019;194:401-09.  
740 doi: <https://dx.doi.org/10.1016/j.drugalcdep.2018.09.029>
- 741 68. Sagy I, Bar-Lev Schleider L, Abu-Shakra M, et al. Safety and Efficacy of Medical Cannabis in  
742 Fibromyalgia. *Journal of Clinical Medicine* 2019;8(6):05. doi:  
743 <https://dx.doi.org/10.3390/jcm8060807>
- 744 69. Sinclair J, Smith CA, Abbott J, et al. Cannabis Use, a Self-Management Strategy Among Australian  
745 Women With Endometriosis: Results From a National Online Survey. *Journal of Obstetrics &*  
746 *Gynaecology Canada: JOGC* 2020;42(3):256-61. doi:  
747 <https://dx.doi.org/10.1016/j.jogc.2019.08.033>
- 748 70. Ueberall MA, Essner U, Mueller-Schwefe GHH. Effectiveness and tolerability of THC:CBD oromucosal  
749 spray as add-on measure in patients with severe chronic pain: Analysis of 12-week open-label  
750 real-world data provided by the German pain e-registry. *Journal of Pain Research* 2019;12:1577-  
751 604. doi: <http://dx.doi.org/10.2147/JPR.S192174>
- 752 71. Vigil JM, Stith SS, Adams IM, et al. Associations between medical cannabis and prescription opioid  
753 use in chronic pain patients: A preliminary cohort study. *PLoS ONE [Electronic Resource]*  
754 2017;12(11):e0187795. doi: <https://dx.doi.org/10.1371/journal.pone.0187795>
- 755 72. Yassin M, Oron A, Robinson D. Effect of adding medical cannabis to analgesic treatment in patients  
756 with low back pain related to fibromyalgia: an observational cross-over single centre study.  
757 *Clinical & Experimental Rheumatology* 2019;37 Suppl 116(1):13-20.
- 758 73. Giorgi V, Bongiovanni S, Atzeni F, et al. Adding medical cannabis to standard analgesic treatment for  
759 fibromyalgia: a prospective observational study. *Clinical & Experimental Rheumatology* 2020;38  
760 Suppl 123(1):53-59.
- 761 74. Grant BF, Dawson DA, Stinson FS, et al. The Alcohol Use Disorder and Associated Disabilities  
762 Interview Schedule-IV (AUDADIS-IV): reliability of alcohol consumption, tobacco use, family  
763 history of depression and psychiatric diagnostic modules in a general population sample. *Drug*  
764 *Alcohol Depend* 2003;71(1):7-16. doi: 10.1016/s0376-8716(03)00070-x [published Online First:  
765 2003/06/25]
- 766 75. Humeniuk R, Ali R. Validation of the Alcohol, Smoking and Substance Involvement Screening Test  
767 (ASSIST) and pilot brief intervention: a technical report of phase II findings of the WHO ASSIST  
768 Project. Validation of the alcohol, smoking and substance involvement screening test (ASSIST)  
769 and pilot brief intervention: a technical report of phase II findings of the WHO ASSIST  
770 Project2006.
- 771 76. Stockings E, Campbell G, Hall WD, et al. Cannabis and cannabinoids for the treatment of people with  
772 chronic noncancer pain conditions: a systematic review and meta-analysis of controlled and  
773 observational studies. *Pain* 2018;159(10):1932-54. doi: 10.1097/j.pain.0000000000001293  
774 [published Online First: 2018/05/31]
- 775 77. Allan GM, Finley CR, Ton J, et al. Systematic review of systematic reviews for medical cannabinoids:  
776 Pain, nausea and vomiting, spasticity, and harms. *Can Fam Physician* 2018;64(2):e78-e94.  
777 [published Online First: 2018/02/17]

- 778 78. Campeny E, López-Pelayo H, Nutt D, et al. The blind men and the elephant: Systematic review of  
779 systematic reviews of cannabis use related health harms. *Eur Neuropsychopharmacol* 2020;33:1-  
780 35. doi: 10.1016/j.euroneuro.2020.02.003 [published Online First: 2020/03/14]
- 781 79. Memedovich KA, Dowsett LE, Spackman E, et al. The adverse health effects and harms related to  
782 marijuana use: an overview review. *CMAJ Open* 2018;6(3):E339-e46. doi:  
783 10.9778/cmajo.20180023 [published Online First: 2018/08/18]
- 784 80. Nugent SM, Morasco BJ, O'Neil ME, et al. The Effects of Cannabis Among Adults With Chronic Pain  
785 and an Overview of General Harms: A Systematic Review. *Ann Intern Med* 2017;167(5):319-31.  
786 doi: 10.7326/m17-0155 [published Online First: 2017/08/15]
- 787 81. Els C, Jackson TD, Kunyk D, et al. Adverse events associated with medium- and long-term use of  
788 opioids for chronic non-cancer pain: an overview of Cochrane Reviews. *Cochrane Database Syst*  
789 *Rev* 2017;10(10):Cd012509. doi: 10.1002/14651858.CD012509.pub2 [published Online First:  
790 2017/10/31]
- 791 82. Diagnostic and statistical manual of mental disorders : DSM-5. Arlington, VA: American Psychiatric  
792 Association 2013.
- 793 83. Goodman JE, McGrath PJ. The epidemiology of pain in children and adolescents: a review. *Pain*  
794 1991;46(3):247-64. doi: 10.1016/0304-3959(91)90108-a [published Online First: 1991/09/01]
- 795 84. Myles H, Myles N, Large M. Cannabis use in first episode psychosis: Meta-analysis of prevalence, and  
796 the time course of initiation and continued use. *Aust N Z J Psychiatry* 2016;50(3):208-19. doi:  
797 10.1177/0004867415599846 [published Online First: 2015/08/20]
- 798 85. Shanthanna H, Gilron I, Rajarathinam M, et al. Benefits and safety of gabapentinoids in chronic low  
799 back pain: A systematic review and meta-analysis of randomized controlled trials. *PLoS Med*  
800 2017;14(8):e1002369. doi: 10.1371/journal.pmed.1002369 [published Online First: 2017/08/16]
- 801 86. Ferraro MC, Bagg MK, Wewege MA, et al. Efficacy, acceptability, and safety of antidepressants for  
802 low back pain: a systematic review and meta-analysis. *Syst Rev* 2021;10(1):62. doi:  
803 10.1186/s13643-021-01599-4 [published Online First: 2021/02/26]
- 804 87. Busse JW, Craigie S, Juurlink DN, et al. Guideline for opioid therapy and chronic noncancer pain.  
805 *Cmaj* 2017;189(18):E659-e66. doi: 10.1503/cmaj.170363 [published Online First: 2017/05/10]
- 806
